# Supplementary material for: Metastable FeCN2@nitrogen-doped carbon with high pseudocapacitance as an anode material for sodium ion batteries
Source: Royal Society of Chemistry journal article supplement (doi:10.1039/d1nr06705b), 2021-12-06
Supplement: d1nr06705b1.pdf [file d1nr06705b1.pdf]

## *Supporting Information*

### **Metastability-induced high pseudocapacitance for FeCN<sub>2</sub>@NC anode materials as sodium ion batteries**

Hui Qi<sup>1</sup>, Chenxu Zhao<sup>1</sup>, Jianfeng Huang<sup>2,\*</sup>, Chaozheng He<sup>1,\*</sup>, Lin Tang<sup>1</sup>, and Wen Deng<sup>1</sup>

<sup>1</sup> Xi'an Technological University, Xi'an, Shaanxi 710021, China

<sup>2</sup> Shaanxi University of Science & Technology, Xi'an, Shaanxi 710021, China

Corresponding author: huangjf@sust.edu.cn; hecz2019@xatu.edu.cn

### *Contents*

Scheme S1. Detailed illustration of the formation of net-like gel

Figure S1 (a) XRD patterns of FeCN<sub>2</sub>@NC after half a year of exposure to air  
(b) Raman spectrum  
(c) XPS survey spectra of FeCN<sub>2</sub>@NC;  
(d) XRD patterns of NC substrates  
(e) element mapping nitrogen doped carbon (NC) substrates  
(f) photo graph of the gel obtained at 200 °C  
(g) XRD patterns of the intermediate products obtained at 200 and 400 °C  
(h) FTIR spectra of the intermediate products obtained at 200 and 400 °C

Figure S2 TGA curve of FeCN<sub>2</sub>@NC composites

Figure S3 (a, b) SEM images and (c) XRD patterns of reference sample Fe<sub>2</sub>O<sub>3</sub>@NC

Figure S4 Comparison of iron-based sodium-ion anodes in this work and previous reports

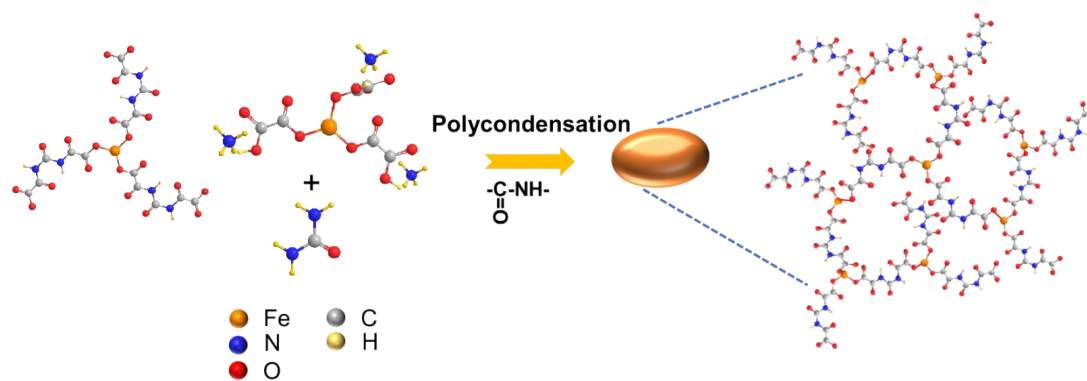

Scheme S1. Detailed illustration of the formation of net-like gel

The polyamidation reaction between of  $\text{-COOH}$  of ammonium ferric oxalate and  $\text{-NH}_2$  of urea takes place to form gel composed of net-like iron-complex molecular framework during heating under Ar atmosphere.

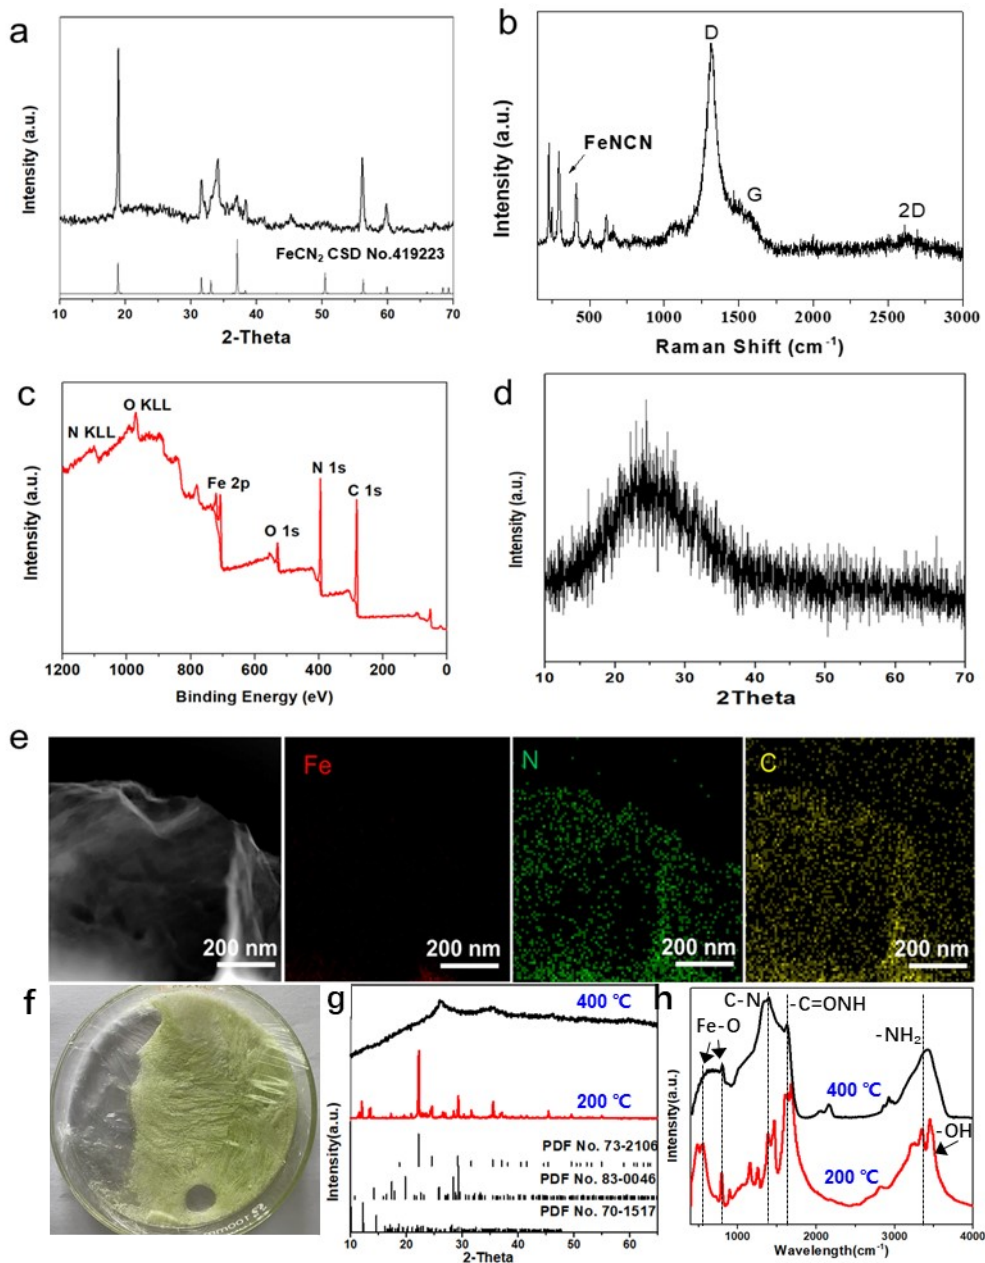

Figure S1 (a) XRD patterns of  $\text{FeCN}_2@\text{NC}$  after half a year of exposure to air (b) Raman spectrum (c) XPS survey spectra of  $\text{FeCN}_2@\text{NC}$ ; (d) XRD patterns of NC substrates (e) element mapping of Fe, N and C for nitrogen doped carbon (NC) substrates (f) photo graph of the gel obtained at 200 °C (g) XRD patterns and (h) FTIR spectra of the intermediate products obtained at 200 and 400 °C

The XRD patterns of  $\text{FeCN}_2@\text{NC}$  (Figure S1a) which is exposed to air for half a year

can be indexed to  $\text{FeCN}_2$ , indicating there is no obvious phase transformation, confirming improved phase stability after carbon coating. Raman spectra (Figure S1b) and the XRD patterns of the substrates show the carbon in the composites are mainly amorphous. The element mapping results reveal N and C elements are contained in the substrates. Figure S1(f) shows the gel obtained at 200 °C. The XRD patterns shows intermediate products obtained at 200 °C mainly includes urea (PDF No. 73-2106), compounds of C, N and O (PDF No. 83-0046) and complex of iron and C,N and O(PDF No.70-1517). When the temperature raised to 400 °C, the mixture transformed to amorphous carbon (Figure S1(g)). Figure S1(h) shows the FTIR spectra of the intermediate products. There are plenty of  $-\text{NH}_2$ ,  $-\text{OH}$  organic groups ( $3200\text{-}3500\text{ cm}^{-1}$ ) in the compounds. The strong adsorption around  $1700\text{ cm}^{-1}$  could confirm the existence of  $\text{C}=\text{O}-\text{NH}-$  group in the iron-complex. The peak at  $1375\text{ cm}^{-1}$  could attribute to the C-N bond in the compounds. The peaks ranging from  $500\text{-}790\text{ cm}^{-1}$  are related to Fe-O bonds in the Fe-complex.

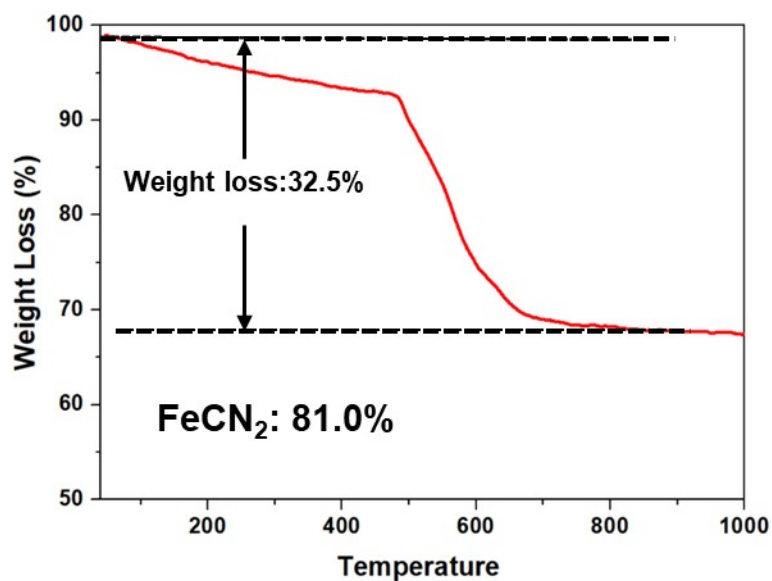

Figure S2 TGA curve of FeCN<sub>2</sub>@NC composites

TGA analysis is carried out in air to determine the proportion of FeCN<sub>2</sub> in the composites. According to the remaining mass of oxidized products (Fe<sub>2</sub>O<sub>3</sub>), the FeCN<sub>2</sub> content is calculated about 81% .

$$\text{Mass (Fe element)} = \text{Mass(Fe}_2\text{O}_3) * 0.7 = \text{Mass( (FeCN}_2\text{)} * 0.583$$

$$\text{Mass (FeCN}_2\text{)} = \text{Mass( (Fe}_2\text{O}_3) * 0.7 / 0.583 = 0.81$$

Consequently, FeCN<sub>2</sub> accounts for 81% in FeCN<sub>2</sub>@NC composites.

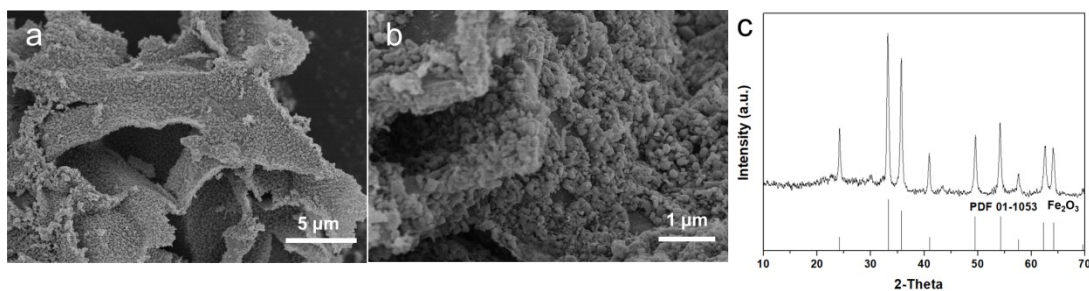

Figure S3 (a, b) SEM images and (c) XRD patterns of reference sample  $\text{Fe}_2\text{O}_3@\text{NC}$

The reference sample  $\text{Fe}_2\text{O}_3@\text{NC}$  is obtained by the oxidation of  $\text{FeCN}_2@\text{NC}$  in air heating at 300 °C for 2 hours at a heating rate of 5 °C/min. Figure S2(a, b) show a morphology of NC substrate supported  $\text{Fe}_2\text{O}_3$  structure, which is similar to  $\text{FeCN}_2@\text{NC}$ .

The XRD patterns of the composites is fully consistent with the standard iron oxides (PDF # 01-1053).

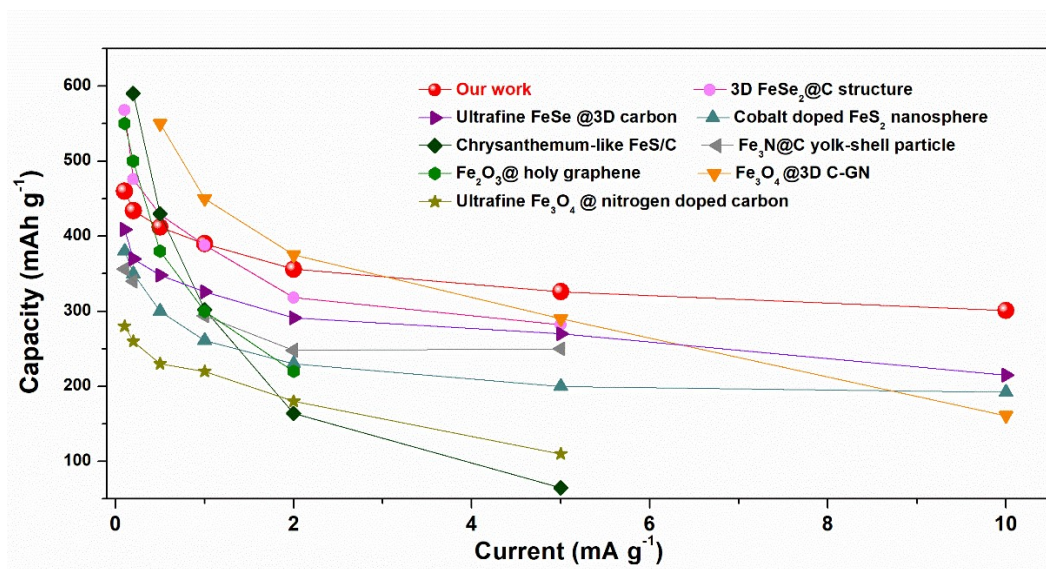

Figure S4 Comparison of iron-based sodium-ion anodes in this work and previous reports<sup>[1-8]</sup>

## References

- [1] Z. Li, Y. Fang, J. Zhang, X.W. Lou, Necklace-Like Structures Composed of Fe<sub>3</sub>N@C Yolk-Shell Particles as an Advanced Anode for Sodium-Ion Batteries, *Adv. Mater.*, 30 (2018) 1800525.
- [2] H. Fan, H. Yu, Y. Zhang, J. Guo, Z. Wang, H. Wang, N. Zhao, Y. Zheng, C. Du, Z. Dai, Q. Yan, J. Xu, 1D to 3D hierarchical iron selenide hollow nanocubes assembled from FeSe<sub>2</sub>@C core-shell nanorods for advanced sodium ion batteries, *Energy Storage Materials*, 10 (2018) 48-55.
- [3] K. Zhang, M. Park, L. Zhou, G.-H. Lee, J. Shin, Z. Hu, S.-L. Chou, J. Chen, Y.-M. Kang, Cobalt-Doped FeS<sub>2</sub> Nanospheres with Complete Solid Solubility as a High-Performance Anode Material for Sodium-Ion Batteries, *Angew. Chem. Int. Ed.*, 128 (2016) 1-6.
- [4] L.-Y. Qi, Y.-W. Zhang, Z.-C. Zuo, Y.-L. Xin, C.-K. Yang, B. Wu, X.-X. Zhang, H.-H. Zhou, In situ quantization of ferroferric oxide embedded in 3D microcarbon for ultrahigh performance sodium-ion batteries, *J. Mater. Chem. A.*, 4 (2016) 8822-8829.
- [5] Z. Cao, H. Song, B. Cao, J. Ma, X. Chen, J. Zhou, Z. Ma, Sheet-on-sheet chrysanthemum-like C/FeS microspheres synthesized by one-step solvothermal method for high-performance sodium-ion batteries, *J. Power Sources* 364 (2017) 208-214.

- [6] C. Lv, H. Liu, D. Li, S. Chen, H. Zhang, X. She, X. Guo, D. Yang, Ultrafine FeSe nanoparticles embedded into 3D carbon nanofiber aerogels with FeSe/Carbon interface for efficient and long-life sodium storage, *Carbon*, 143 (2019) 106-115.
- [7] C. Zheng, X. Xu, Q. Lin, Y. Chen, Z. Guo, B. Jian, N. Li, H. Zhang, W. Lv, Confined growth of Fe<sub>2</sub>O<sub>3</sub> nanoparticles by holey graphene for enhanced sodium-ion storage, *Carbon*, 176 (2021) 31-38.
- [8] Q. Zhao, Z. Xia, T. Qian, X. Rong, M. Zhang, Y. Dong, J. Chen, H. Ning, Z. Li, H. Hu, M. Wu, PVP-assisted synthesis of ultrafine transition metal oxides encapsulated in nitrogen-doped carbon nanofibers as robust and flexible anodes for sodium-ion batteries, *Carbon*, 174 (2021) 325-334.
